# Supplementary material for: Revisiting the Diego Blood Group System in Amerindians: Evidence for Gene-Culture Comigration
Source: PLoS One. 2015 Jul 6;10(7):e0132211. doi: 10.1371/journal.pone.0132211 (PMC4493026; doi:10.1371/journal.pone.0132211)
Supplement: S1 Table — The file is a MS Excel spreadsheet 97–2003 (.xls) and is coupled with a Readme file (S1 File). (XLS) [file pone.0132211.s002.xls]

## Sheet: Additional_table1
Table S1
Distribution of the 144 populations considered in the present study according to geographic, cultural and environmental centres, listed according to latitude.
For detailed information see the Readme file
Population	Country	Latitude	Longitude	N	DI*A allele fequency	Region	Ruhlen Linguistic classes	Köppen-Geiger climate classes		Main lifestyle	regional maize species/cassava	Anopheline species	Humanized landscape
								medium resolution	low resolution
Alacalufe	Chile	-55	-68	N/A	0	Subarctic	Andean	ET	E	Agriculturist	Absent	none	no
Aleut	USA	61	-149	N/A	0.134	North America	Eskimo-Aleut	Df	D	Marine hunter/gatherer	Absent	none	no
Apache	USA	35.1	-110.7	73	0.021	North America	Na-Dene	Bs	B	Hunter-gatherer/forager	Southwestern USA	none	yes
Araucano	Chile	-39.3	-72	100	0.02	Subarctic	Andean	Cs	C	Agriculturist	Absent	none	no
Arawaco	Venezuela	9	-71.5	152	0.027	Northwestern South America	Equatorial	Am	A	Hunter-gatherer/forager	Manihot	3-7;8	yes
Asurini	Brazil	-3.6	-49.7	104	0.23	Eastern South America	Equatorial	Am	A	Hunter-gatherer/forager	Manihot	3;5;7;8	yes
Atacameno	Chile	-23	-69	N/A	0.039	Andean	Isolate	Bw	B	Agriculturist	Core Andean S. American	none	yes
Athapaskans	Canada	64	-150	206	0.002	Subarctic	Na-Dene	Df	D	Hunter-gatherer/forager	Absent	none	no
Aymara	Peru	-15.8	-70	58	0.09	Andean	Andean	ET	E	Agriculturist	Core Andean/Other S. American	2	yes
Bari	Venezuela	9.3	-73	126	0	Northwestern South America	Chibchan	Aw	A	Agriculturist	Absent	3-7;8	yes
Blackfoot	Canada	48	-109	66	0.023	North America	Almosan	Df	D	Agriculturist	Absent	none	no
Blood	Canada	49.5	-113.3	50	0.03	North America	Almosan	Df	D	Agriculturist	Absent	none	no
Bokotta	Panama	8.5	-81.5	230	0	Lower Meso America	Chibchan	Af	A	Agriculturist	Absent	2;4-6	yes
Boruca	CostaRica	9	-83	180	0.034	Lower Meso America	Chibchan	Af	A	Agriculturist	Absent	2;4	yes
Bribri	CostaRica	9.4	-83.2	328	0	Lower Meso America	Chibchan	Af	A	Agriculturist	Absent	2;4	yes
Cabecar	CostaRica	9.8	-83.3	288	0	Lower Meso America	Chibchan	Af	A	Agriculturist	Absent	2;4	yes
Campa Piro	Peru	-10	-74	N/A	0.224	Andean	Equatorial	Am	A	Hunter-gatherer/forager	Manihot	2	yes
Carajà	Brazil	-10.5	-50.1	36	0.201	Eastern South America	Macro-Ge	Aw	A	Hunter-gatherer/forager	Manihot	3;5;7;8	yes
Carib	CostaRica	8.4	-65.7	444	0.198	Lower Meso America	Macro-Carib	Af	A	Hunter-gatherer/forager	Manihot	2;4	yes
Cashinahua	Brazil	-9	-71	N/A	0.19	Eastern South America	Macro-Panoan	Am	A	Hunter-gatherer/forager	Manihot	3;5;7;8	yes
Cayapa	Ecuador	0.5	-79.5	N/A	0.04	Andean	Paezan	Aw	A	Agriculturist	Manihot	none	yes
Cayapo	Brazil	-7.2	-52.3	N/A	0.227	Eastern South America	Macro-Ge	Aw	A	Hunter-gatherer/forager	Manihot	3;5;7;8	yes
Chamacoco	Paraguay	-20.2	-58.2	88	0.012	Chaco	Equatorial	Aw	A	Hunter-gatherer/forager	Absent	none	yes
Chane	Bolivia	-17.8	-68	N/A	0.084	Andean	Equatorial	Cw	C	Agriculturist	Absent	none	yes
Cherokee	Usa	35	-95	163	0	North America	Keresiouan	Cf	C	mixed	Absent	none	yes
Chiapanec	Mexico	16.3146	-91.981	41	0.0377111	Central America	Oto-Manguean	Aw	A	Agriculturist	Guatemalian	none	yes
Chipaya	Bolivia	-18.7	-68	N/A	0.039	Andean	Equatorial	Cw	C	Agriculturist	Absent	none	yes
Chipewyan	Canada	59.6	-107.3	148	0.056	Subarctic	Na-Dene	Df	D	Hunter-gatherer/forager	Absent	none	no
Choco	Colombia	7	-76	80	0.018	Northwestern South America	Paezan	Aw	A	Agriculturist	Absent	2-5;7;8	yes
Chol	Guatemala	15.9	-91.5	45	0.293	Central America	Penutian	Aw	A	Agriculturist	Guatemalian	2;4;7	yes
Chorotega	Nicaragua	10.1	-85.5	77	0.007	Central America	Oto-Manguean	Am	A	Agriculturist	Absent	2;4	yes
Choroti	Argentina	-22.3	-63.7	248	0.13	Chaco	Macro-Panoan	Cw	C	Hunter-gatherer/forager	Absent	none	yes
Chulupi	Paraguay	-22.4	-60	85	0.125	Chaco	Macro-Panoan	Aw	A	Hunter-gatherer/forager	Absent	none	yes
Cinta Larga	Brazil	-11	-60	106	0.187	Eastern South America	Equatorial	Aw	A	Hunter-gatherer/forager	Manihot	3;5;7;8	yes
Colorado	Ecuador	-0.2	-79	N/A	0.01	Andean	Paezan	Aw	A	Agriculturist	Other South American	none	yes
Copper Eskimo	Usa	68.3368	-164.249	320	0	North America	Eskimo-Aleut	Df	D	Marine hunter/gatherer	Absent	none	no
Cree	Canada	50	-102	65	0.05	North America	Almosan	Df	D	Agriculturist	Eastern & Central USA	none	no
Cuiva	Colombia	6.5	-70.5	N/A	0	Northwestern South America	Equatorial	Aw	A	Hunter-gatherer/forager	Other South American	none	yes
Dogrib	Canada	63	-114	N/A	0	Subarctic	Na-Dene	Df	D	Marine hunter/gatherer	Absent	none	no
Emerillon	French Guiana	3	-53	153	0.289	Eastern South America	Equatorial	Af	A	Hunter-gatherer/forager	Manihot	3;5;7;8	yes
Eskimo1	Canada	66	-80	N/A	0	Subarctic	Eskimo-Aleut	Df	D	Marine hunter/gatherer	Absent	none	no
Eskimo2	Canada	68.6	-125.3	362	0	Subarctic	Eskimo-Aleut	Df	D	Marine hunter/gatherer	Absent	none	no
Eskimo3	Usa	69.8	-152.5	238	0.004	North America	Eskimo-Aleut	Df	D	Marine hunter/gatherer	Absent	none	no
Eskimo4	Greenland	71	-53	150	0	Subarctic	Eskimo-Aleut	ET	E	Marine hunter/gatherer	Absent	none	no
Eskimo5	Greenland	72	-24	68	0	Subarctic	Eskimo-Aleut	ET	E	Marine hunter/gatherer	Absent	none	no
Goajiro	Venezuela	11	-73	271	0.038	Northwestern South America	Equatorial	Aw	A	Hunter-gatherer/forager	Manihot	3-5;7;8	yes
Guahibo	Venez/Colombia	5.8	-69.5	76	0.0751956	Northwestern South America	Equatorial	Aw	A	Hunter-gatherer/forager	Absent	none	yes
Guarani	Brazil	-27	-50	34	0.233	Eastern South America	Equatorial	Am	A	Hunter-gatherer/forager	Manihot	3;5;7;8	yes
Guatuso	CostaRica	10.3	-83.9	118	0	Lower Meso America	Chibchan	Af	A	Agriculturist	Absent	2;4	yes
Guayaki	Paraguay	-26.1	-55.9	101	0.023	Chaco	Equatorial	Aw	A	Hunter-gatherer/forager	Manihot	none	yes
Guaymi	Panama	8.5	-82	1358	0	Lower Meso America	Chibchan	Af	A	Agriculturist	Absent	2;4-6	yes
Guayqueri/Yaraban	Venezuela	5.3	-66.1	103	0.0651203	Northwestern South America	Macro-Carib	Am	A	Hunter-gatherer/forager	Absent	none	yes
Haida	Canada	54	-132	N/A	0.003	Subarctic	Na-Dene	Df	D	Marine hunter/gatherer	Absent	none	no
Huetar	CostaRica	10	-84	N/A	0	Lower Meso America	Chibchan	Af	A	Agriculturist	Absent	2;4	yes
Ica	Colombia	9.8	-74.3	213	0.18	Northwestern South America	Chibchan	Cw	C	Agriculturist	Absent	2-5;7;8	yes
Incas	Peru	-9	-76	N/A	0.14	Andean	Andean	ET	E	Agriculturist	Core Andean/Other S. American	2	yes
Ingano	Colombia	1	-77	N/A	0.172	Northwestern South America	Andean	Cf	C	Agriculturist	Other South American	2-5;7;8	yes
Iroquois	Usa	35.6269	-82.5549	N/A	0.0513167	North America	Keresiouan	Cf	C	Agriculturist	Eastern & Central USA	none	yes
Jicaque	Honduras	15.14	-87.14	90	0.0455368	Central America	Isolate	Am	A	Agriculturist	Absent	none	yes
Jivaroan	Peru	-3.5	-78.3	N/A	0.087	Andean	Equatorial	Af	A	Hunter-gatherer/forager	Core Andean/Other S. American	none	yes
Kaingang	Brazil	-26.7	-51.7	464	0.213	Eastern South America	Macro-Ge	Aw	A	Hunter-gatherer/forager	Manihot	3;5;7;8	yes
Kalina	French Guiana	5.7	-54	452	0.159	Eastern South America	Macro-Carib	Af	A	Hunter-gatherer/forager	Manihot	3;5-8	yes
Kaqchikel	Guatemala	15	-91	281	0.0864982	Central America	Penutian	Cw	C	Agriculturist	Guatemalian	none	yes
Kekchi	Guatemala	15.5	-90.4	122	0.029	Central America	Penutian	Aw	A	Agriculturist	Guatemalian	2;4;7	yes
Kraho	Brazil	-6.4	-48.1	134	0.045	Eastern South America	Macro-Ge	Aw	A	Hunter-gatherer/forager	Manihot	3;5;7;8	yes
Kuna	Panama	9	-78	388	0.048	Lower Meso America	Chibchan	Af	A	Agriculturist	Absent	2;4-6	yes
Kutchin	Usa	67.485	-146.792	114	0	North America	Na-Dene	Df	D	Hunter-gatherer/forager	Absent	none	no
Lacandon	Mexico	18	-94	94	0.121	Central America	Penutian	Am	A	Agriculturist	Guatemalian	2;4	yes
Lenca	Honduras	14.3	-87.7	116	0.0486851	Central America	Isolate	Am	A	Agriculturist	Absent	none	yes
Lengua	Paraguay	-22.5	-60.7	307	0.058	Chaco	Macro-Panoan	Aw	A	Hunter-gatherer/forager	Absent	none	yes
Macushi	Brazil	4.1	-60.3	1009	0.13	Eastern South America	Macro-Carib	Af	A	Hunter-gatherer/forager	Manihot	3;5;7;8	yes
Makiritare	Venezuela	4.5	-65.1	915	0.19	Northwestern South America	Macro-Carib	Am	A	Hunter-gatherer/forager	Manihot	3-5;7;8	yes
Mam	Guatemala	15	-91	186	0.114	Central America	Penutian	Aw	A	Agriculturist	Guatemalian	2;4;7	yes
Mapuche	Argentina	-40.7417	-69.5882	391	0.0174655	Andean	Isolate	BS	B	Agriculturist	Absent	none	no
Mataco	Argentina	-23.1	-64.4	36	0.184	Chaco	Macro-Panoan	Cw	C	Hunter-gatherer/forager	Absent	none	yes
Maue	Brazil	-3.4	-56.5	N/A	0.14	Eastern South America	Equatorial	Am	A	Hunter-gatherer/forager	Manihot	3;5;7;8	yes
Maya	Mexico	20	-88	167	0.0988743	Central America	Penutian	Aw	A	Agriculturist	Guatemalian	none	yes
Mazatec	Mexico	18.1309	-96.8436	136	0.0603192	Central America	Oto-Manguean	Aw	A	Agriculturist	Guatemalian	none	yes
Mescaleros	Usa	33.4369	-104.55	108	0.0186744	North America	Na-Dene	Bs	B	Hunter-gatherer/forager	Southwestern USA	none	yes
Micmac	USA	45	-69	N/A	0.041	North America	Almosan	Cf	C	Hunter-gatherer/forager	Eastern & Central USA	none	yes
Miskito	Nicaragua	14	-83.8	150	0.007	Central America	Chibchan	Am	A	Mixed	Absent	none	yes
Misumalpan	Nicaragua	14	-83	N/A	0.051	Central America	Chibchan	Am	A	Agriculturist	Absent	2;4	yes
Mixtec	Mexico	17.1	-96.7	129	0.102	Central America	Oto-Manguean	Cw	C	Agriculturist	Mexican	2;4	yes
Mohawk	USA	44	-75	N/A	0.016	North America	Keresiouan	Cf	C	mixed	Absent	none	yes
Montagnais	Canada	50.3	-65	84	0.094	North America	Almosan	Df	D	Agriculturist	Absent	none	no
Moro/Ayoreo	Paraguay	-22.1	-60	36	0	Chaco	Equatorial	Aw	A	Hunter-gatherer/forager	Absent	none	yes
Mundurucù	Brazil	-5.8	-58.3	33	0.097	Eastern South America	Equatorial	Am	A	Hunter-gatherer/forager	Manihot	3;5;7;8	yes
Nahuatl	Mexico	19.6	-98	272	0.09	Central America	Uto-Aztecan	Cw	C	Agriculturist	Mexican	2;4	yes
Naskapi	Canada	55.3	-60.6	152	0.043	North America	Almosan	Df	D	Agriculturist	Absent	none	no
Navajo	Usa	37	-111	237	0.025	North America	Na-Dene	Bs	B	Hunter-gatherer/forager	Southwestern USA	none	yes
Ninam	Brazil	3.9552	-62.9616	375	0	Eastern South America	Isolate	Af	A	Hunter-gatherer/forager	Absent	none	yes
Noanama	Colombia	6	-77	100	0	Northwestern South America	Chibchan	Af	A	Agriculturist	Absent	2-5;7;8	yes
Nootka	USA	49.5	-125	N/A	0.038	North America	Almosan	Cf	C	Marine hunter/gatherer	Absent	none	no
Ojibwa	Canada	46.5	-81	N/A	0.091	North America	Almosan	Df	D	Agriculturist	Eastern & Central USA	none	no
Paez	Colombia	2.5	-76.6	104	0.174	Northwestern South America	Isolate	Af	A	Agriculturist	Other South American	none	yes
Palikur	French Guiana	4	-51.7	479	0.247	Eastern South America	Equatorial	Af	A	Hunter-gatherer/forager	Manihot	3;5-8	yes
Panare	Venezuela	7	-65.6	33	0.349	Northwestern South America	Macro-Carib	Aw	A	Mixed	Absent	none	yes
Parakanã	Brazil	-5.9	-52.7	217	0.298	Eastern South America	Equatorial	Am	A	Hunter-gatherer/forager	Manihot	3;5;7;8	yes
Paraujano	Venezuela	8.9	-71.5	120	0.0513167	Northwestern South America	Equatorial	Aw	A	Marine hunter/gatherer	Other South American	none	yes
Paya	Honduras	14.85	-85.9	53	0.0481597	Central America	Chibchan	Am	A	Agriculturist	Absent	none	yes
Pemon	Venezuela	5.5	-62	387	0.097	Northwestern South America	Macro-Carib	Am	A	Hunter-gatherer/forager	Manihot	3-5;7;8	yes
Penobscot	USA	44.9	-68.6	249	0.041	North America	Almosan	BS	B	Agriculturist	Eastern & Central USA	1;2	yes
Piaroa	Venezuela	3.70455	-66.0355	220	0.118136	Northwestern South America	Equatorial	Af	A	Hunter-gatherer/forager	Absent	none	yes
Pima	USA	33.5	-111.8	N/A	0.027	North America	Uto-Aztecan	BS	B	Agriculturist	Southwestern USA	1;2	yes
Pocomàn	Guatemala	14.7	-90.5	80	0.111	Central America	Penutian	Aw	A	Agriculturist	Guatemalian	2;4;7	yes
Quechua	Peru	-10.9	-64.2	934	0.105	Andean	Andean	ET	E	Agriculturist	Core Andean/Other S. American	2	yes
Rama	Nicaragua	12	-84	37	0	Central America	Chibchan	Am	A	Agriculturist	Absent	2;4	yes
Seminole	USA	35	-97	N/A	0.032	North America	Penutian	Cf	C	mixed	Absent	none	yes
Shipibo	Peru	-8.4	-74.5	N/A	0.386	Andean	Macro-Panoan	Af	A	Hunter-gatherer/forager	Manihot	2	yes
Siona	Ecuador	0.3	-76	N/A	0.229	Andean	Equatorial	Aw	A	Hunter-gatherer/forager	Core Andean/Other S. American	none	yes
Siriono	Bolivia	-15	-64	N/A	0.019	Andean	Equatorial	Aw	A	Agriculturist	Other South American	none	yes
Slave	Canada	65	-125	N/A	0.006	Subarctic	Na-Dene	Df	D	Marine hunter/gatherer	Absent	none	no
Subtiaba	Nicaragua	12.43	-87	29	0.109	Central America	Oto-Manguean	Aw	A	Agriculturist	Absent	none	yes
Sumo	Nicaragua	14.4	-84.5	103	0.055	Central America	Chibchan	Am	A	Agriculturist	Absent	none	yes
Surui	Brazil	-10.8	-60.2	50	0.175	Eastern South America	Equatorial	Aw	A	Hunter-gatherer/forager	Manihot	3;5;7;8	yes
Tarahumara	Mexico	26.6	-106.5	97	0.01	Central America	Uto-Aztecan	Bs	B	Agriculturist	Mexican	2;4	yes
Tarasco	Mexico	19.9	-100.4	124	0.093	Central America	Isolate	Cw	C	Agriculturist	Mexican	2;4	yes
Tehuelche	Argentina	-45	-71	35	0.044	Andean	Andean	Cs	C	Hunter-gatherer/forager	Manihot	none	no
Teribe	Panama	9.3	-82.6	120	0	Lower Meso America	Chibchan	Af	A	Agriculturist	Absent	2;4-6	yes
Térrabas	CostaRica	9	-83.3	40	0	Lower Meso America	Chibchan	Af	A	Agriculturist	Absent	none	yes
Ticuna	Brazil	-3.97	-69.53	1847	0.16	Eastern South America	Isolate	Af	A	Hunter-gatherer/forager	Absent	none	yes
Tiriyo	Brazil	2	-55.8	127	0.111	Eastern South America	Macro-Carib	Af	A	Hunter-gatherer/forager	Manihot	3;5;7;8	yes
Tlingit	USA	59.2	-135.4	79	0	North America	Na-Dene	Cf	C	Marine hunter/gatherer	Absent	none	no
Toba	Paraguay	-23.1	-59	114	0.112	Chaco	Macro-Panoan	Aw	A	Hunter-gatherer/forager	Manihot	none	yes
Totonaca	Mexico	19.2	-96.1	43	0.111	Central America	Isolate	Cw	C	Agriculturist	Guatemalian	2;4	yes
Tunebo	Colombia	6.4	-73.6	200	0.003	Northwestern South America	Chibchan	Am	A	Agriculturist	Absent	2-5;7;8	yes
Tzeltalan	Mexico	16.6	-92.2	211	0.058	Central America	Penutian	Am	A	Agriculturist	Guatemalian	2;4	yes
Tzotzil	Mexico	16.6	-93.1	166	0.088	Central America	Penutian	Am	A	Agriculturist	Guatemalian	2;4	yes
Urubu-Kaapor	Brazil	-2.5	-46.5	194	0.2	Eastern South America	Equatorial	Am	A	Hunter-gatherer/forager	Manihot	3;5;7;8	yes
Waica/Akawaio	Venezuela	7	-60.5	194	0.3215	Northwestern South America	Macro-Carib	Af	A	Hunter-gatherer/forager	Manihot	3;5;7;8	yes
Wapish	Brazil	3	-60	668	0.165	Eastern South America	Equatorial	Am	A	Hunter-gatherer/forager	Manihot	3;5;7;8	yes
Warao	Venezuela	9	-61.5	154	0.0122791	Northwestern South America	Isolate	Aw	A	Marine hunter/gatherer	Other South American	none	yes
Wayampi	French Guiana	3.2	-52.2	439	0.311	Eastern South America	Equatorial	Af	A	Hunter-gatherer/forager	Manihot	3;5;7;8	yes
Wayana	French Guiana	3	-54.7	438	0.235	Eastern South America	Macro-Carib	Af	A	Hunter-gatherer/forager	Manihot	3;5;7;8	yes
Xavante	Brazil	-13.1	-51.6	326	0.17	Eastern South America	Macro-Ge	Aw	A	Hunter-gatherer/forager	Manihot	3;5;7;8	yes
Yanomama	Venezuela	2.4434	-60.1124	3447	0.00369017	Northwestern South America	Isolate	Af	A	Hunter-gatherer/forager	Absent	none	yes
Yaqui	Mexico	28	-110.3	111	0.027	Central America	Uto-Aztecan	Bs	B	Agriculturist	Mexican	2;4	yes
Yaruro	Venezuela	7	-68	102	0.025	Northwestern South America	Isolate	Aw	A	Marine hunter/gatherer	Absent	none	yes
Yecuana	Venezuela	4.6	-65.1	1394	0.376	Northwestern South America	Macro-Carib	Am	A	Hunter-gatherer/forager	Manihot	3-5;7;8	yes
Yucatenan	Mexico	21	-89	N/A	0.135	Central America	Penutian	Aw	A	Agriculturist	Guatemalian	none	yes
Yupa	Venezuela	9.9	-71.7	649	0.1	Northwestern South America	Macro-Carib	Aw	A	Hunter-gatherer/forager	Other South American	none	yes
Zamucoan	Paraguay	-20	-60	N/A	0.004	Chaco	Equatorial	Aw	A	Hunter-gatherer/forager	Absent	none	yes
Zapotec	Mexico	16.5	-97.2	241	0.073	Central America	Oto-Manguean	Cw	C	Agriculturist	Guatemalian	2;4	yes
Zuni	USA	34	-109	N/A	0.023	North America	Penutian	Bs	B	Hunter-gatherer/forager	Southwestern USA	none	yes

## Sheet: References
References used for DI*A compilation and computation
1. Barrantes R (1990) [An evolutionary hypothesis on the absence of the Diego antigen (Di-a) in Chibcha Amerindians]. Rev Biol Trop 38: 277-282.
2. Barrantes R, Smouse PE, Mohrenweiser HW, Gershowitz H, Azofeifa J, et al. (1990) Microevolution in lower Central America: genetic characterization of the Chibcha-speaking groups of Costa Rica and Panama, and a consensus taxonomy based on genetic and linguistic affinity. Am J Hum Genet 46: 63-84.
3. Black FL, Santos SE, Salzano FM, Callegari-Jacques SM, Weimer TA, et al. (1988) Genetic variation within the Tupi linguistic group: new data on three Amazonian tribes. Ann Hum Biol 15: 337-351.
4. Brothwell DR (1967) The Amerindians of Guyana: a biological review. Eugen Rev 59: 22-45.
5. Callegari-Jacques SM, Salzano FM, Weimer TA, Hutz MH, Black FL, et al. (1994) Further blood genetic studies on Amazonian diversity--data from four Indian groups. Ann Hum Biol 21: 465-481.
6. Cavalli-Sforza LL, Menozzi P, Piazza A (1994) The history and geography of human genes; Press PU, editor. Princeton: Princeton University Press.
7. Chown B, Lewis M, Kaita H (1958) The Diego blood group system. Nature 181: 268.
8. Comas J (1965) Significado de la presencia del antigeno diego entre los amerindios. Anales de Antropologia 2: 89-112.
9. Gershowitz H, Layrisse M, Layrisse Z, Neel JV, Brewer C, et al. (1970) Gene frequencies and microdifferentiation among the Makiritare Indians. I. Eleven blood group systems and the ABH-Le secretor traits: a note on Rh gene frequency determinations. Am J Hum Genet 22: 515-525.
10. Goicoechea AS, Carnese FR, Dejean C, Avena SA, Weimer TA, et al. (2001) Genetic relationships between Amerindian populations of Argentina. Am J Phys Anthropol 115: 133-143.
11. Larrouy G, Marty Y, Ruffié J (1964) Etude hémotypologique des populations indiennes de Guyane française. Les groupes érythrocytaires, Les groupes sériques du système Gm. Bull Mem Soc Anthrop Paris 71: 107-123.
12. Layrisse M, Arends T, Wilbert J (1958) Peculiar distribution of the Diego factor among the Warrau. Nature 181: 118-119.
13. Layrisse M, Wilbert J (1961) Absence of the Diego antigen, a genetic characteristic of early immigrants to South America. Science 134: 1077-1078.
14. Layrisse M, Wilbert J, Arends T (1958) Frequency of blood group antigens in the descendants of Guayqueri Indians. Am J Phys Anthropol 16: 307-318.
15. Levine P, Robinson EA, Layrisse M, Arends T, Domingues Sisco R (1956) The Diego blood factor. Nature 177: 40-41.
16. Long JC, Smouse PE (1983) Intertribal gene flow between the Ye'cuana and Yanomama: genetic analysis of an admixed village. Am J Phys Anthropol 61: 411-422.
17. Matson GA, Sutton HE, Pessoa EM, Swanson J, Robinson A (1968) Distribution of hereditary blood groups among Indians in South America. V. In northern Brazil. Am J Phys Anthropol 28: 303-330.
18. Matson GA, Swanson J (1963) Distribution of Hereditary Blood Antigens among Indians in Middle America. V. In Nicaragua. Am J Phys Anthropol 21: 545-559.
19. Matson GA, Swanson J (1963) Distribution of Blood Groups among Indians in Middle America: IV. Am J Phys Anthropol 21: 319-333.
20. Matson GA, Swanson J (1963) Distribution of Hereditary Blood Antigens among Indians in Middle America: III. In Guatemala. Am J Phys Anthropol 21: 301-317.
21. Matson GA, Swanson J (1963) Distribution of hereditary blood antigens among Indians in Middle America. II. Tzotzil and other Maya. Am J Phys Anthropol 21: 1-14.
22. Matson GA, Swanson J (1965) Distribution of hereditary blood antigens among Indians in Middle America. 8. In Panama. Am J Phys Anthropol 23: 413-426.
23. Matson GA, Swanson J (1965) Distribution of hereditary blood antigens among Indians in Middle America. VII. In Costa Rica. Am J Phys Anthropol 23: 107-121.
24. Mazières S, Sevin A, Bonnet F, Crubézy E, Salzano FM, et al. (2007) Genetic studies in French Guiana populations: Synthesis. Am J Phys Anthropol 132: 292-300.
25. Neel JV, Gershowitz H, Mohrenweiser HW, Amos B, Kostyu DD, et al. (1980) Genetic studies on the Ticuna, an enigmatic tribe of Central Amazonas. Ann Hum Genet 44: 37-54.
26. Neel JV, Gershowitz H, Spielman RS, Migliazza EC, Salzano FM, et al. (1977) Genetic studies of the Macushi and Wapishana Indians. II. Data on 12 genetic polymorphisms of the red cell and serum proteins: gene flor between the tribes. Hum Genet 37: 207-219.
27. Salzano FM, Franco MH, Weimer TA, Callegari-Jacques SM, Mestriner MA, et al. (1997) The Brazilian Xavante Indians revisited: new protein genetic studies. Am J Phys Anthropol 104: 23-34.
28. Salzano FM, Woodall JP, Black FL, Weitkamp LR, Franco MH (1974) Blood groups, serum proteins and hemoglobins of Brazilian Tiriyo Indians. Hum Biol 46: 81-87.
29. Smouse PE, Ward RH (1978) A comparison of the genetic infrastructure of the Ye'cuana and the Yanomama: a likelihood analysis of genotypic variation among populations. Genetics 88: 611-631.
30. Tchen P, Bois E, Lanset S, Feingold N (1981) Blood group antigens in the Emerillon, Wayampi, and Wayana Amerindians of French Guiana. Hum Hered 31: 47-53.
31. Ward RH, Gershowitz H, Layrisse M, Neel JV (1975) The genetic structure of a tribal population, the Yanomama Indians XI. Gene frequencies for 10 blood groups and the ABH-Le secretor traits in the Yanomama and their neighbors; the uniqueness of the tribe. Am J Hum Genet 27: 1-30.
